# Supplementary material
Source: PubMed Central journal article supplement (PMC1482559)

**A.**

Western blot: anti-GPRC anti-GPRN

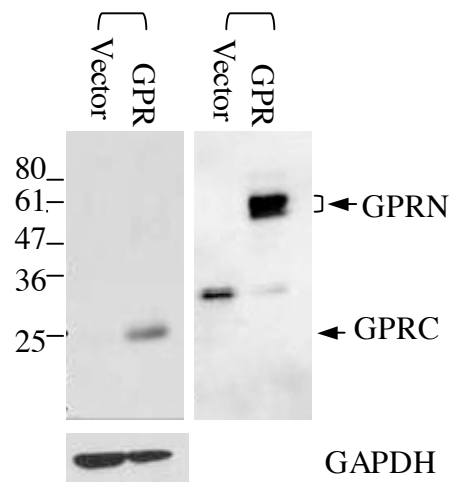**B.**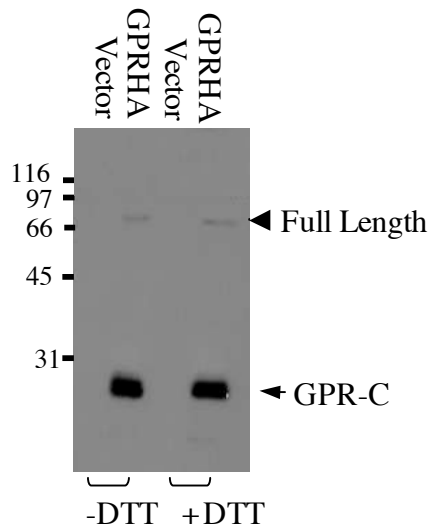**C.**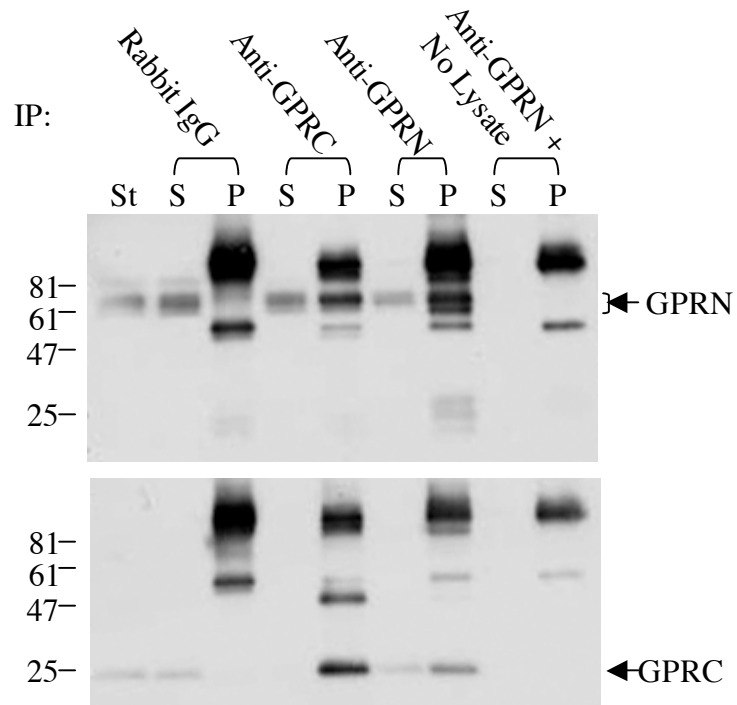

Supplement: pnas_0602681103_2.pdf [file pnas_0602681103_2.pdf]

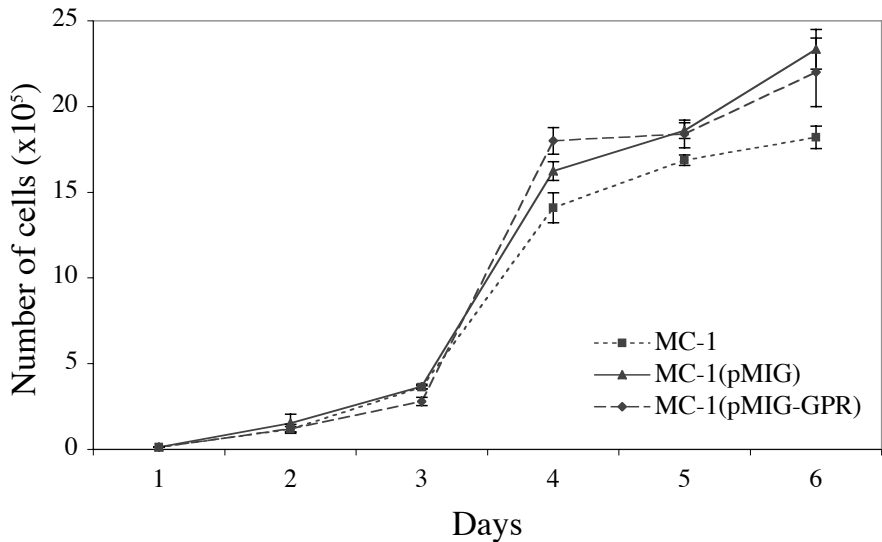

Supplement: pnas_0602681103_3.pdf [file pnas_0602681103_3.pdf]

**A.**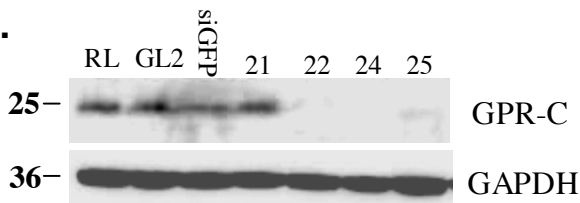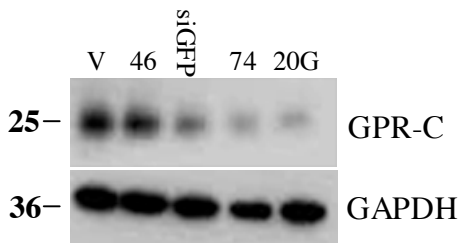**B.**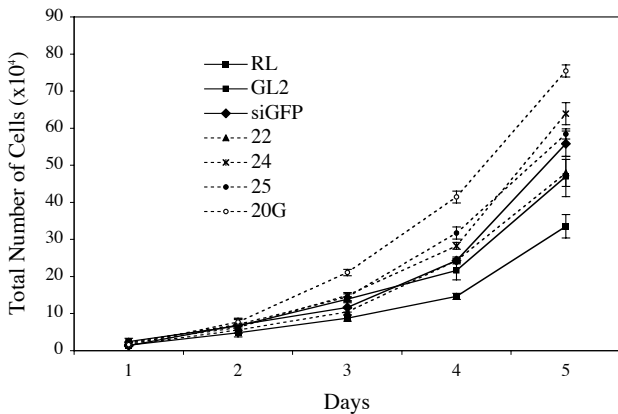

Supplement: pnas_0602681103_4.pdf [file pnas_0602681103_4.pdf]

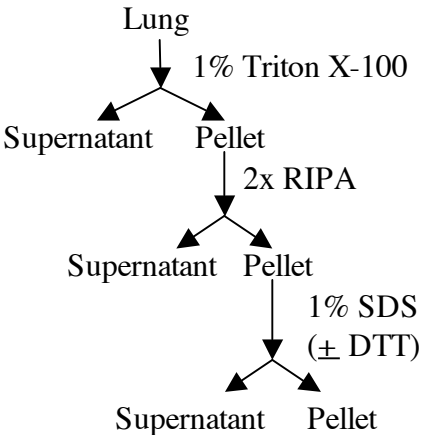

Supplement: pnas_0602681103_5.pdf [file pnas_0602681103_5.pdf]

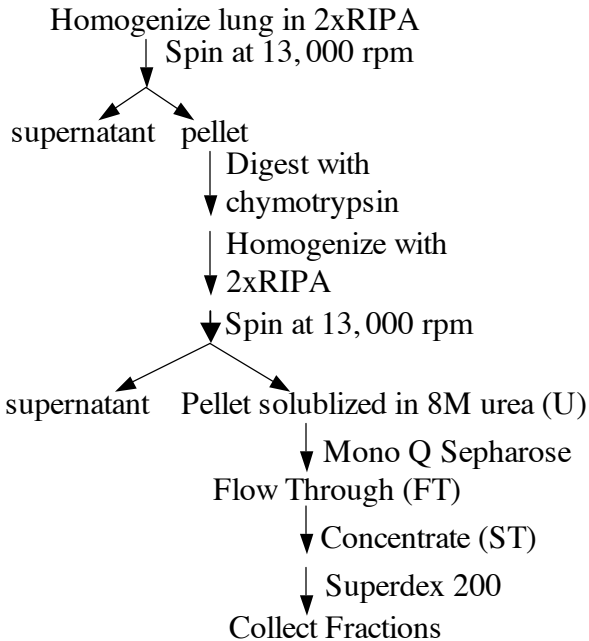

Supplement: pnas_0602681103_6.pdf [file pnas_0602681103_6.pdf]
